# Supplementary material for: Development and validation of a food and nutrition literacy questionnaire for Chinese school-age children
Source: PubMed Central journal article supplement (PMC7787443; doi:10.1371/journal.pone.0244197), 2021-01-06
Supplement: pone.0244197.s003.pdf [file pone.0244197.s003.pdf]

# 中国学龄儿童食物营养素养水平评价问卷(FNLQ-SC)

1. 根据自己的实际情况，在对应的序号处打√。

| 题目                                  | 非常不符合 | 不符合 | 一般 | 符合 | 非常符合 |
|-------------------------------------|-------|-----|----|----|------|
| (1) 我在选择食物时总会考虑是否营养。                | ①     | ②   | ③  | ④  | ⑤    |
| (2) 我通常自己决定吃什么食物。                   | ①     | ②   | ③  | ④  | ⑤    |
| (3) 我对中国饮食文化很感兴趣。                   | ①     | ②   | ③  | ④  | ⑤    |
| (4) 我会做一些中国传统美食(饺子、汤圆、粽子、春卷等)。      | ①     | ②   | ③  | ④  | ⑤    |
| (5) 我遵守餐桌礼仪(长者先、不喧闹、不乱翻饭菜、帮助收拾餐具等)。 | ①     | ②   | ③  | ④  | ⑤    |
| (6) 我吃饭的时候能吃多少就盛/买多少，很少浪费食物。        | ①     | ②   | ③  | ④  | ⑤    |
| (7) 我会帮助家长做饭(洗菜、摘菜、烹饪等)。            | ①     | ②   | ③  | ④  | ⑤    |
| (8) 我吃东西前洗手。                        | ①     | ②   | ③  | ④  | ⑤    |
| (9) 我有两种及以上不爱吃且不吃的食物。               | ①     | ②   | ③  | ④  | ⑤    |
| (10) 我选择食物时会受电视、网络上食品广告的影响。         | ①     | ②   | ③  | ④  | ⑤    |
| (11) 我关注营养健康相关的信息。                  | ①     | ②   | ③  | ④  | ⑤    |
| (12) 我会主动和别人讨论营养健康相关的信息。            | ①     | ②   | ③  | ④  | ⑤    |
| (13) 我购买食品时关注包装上的食品标签。              | ①     | ②   | ③  | ④  | ⑤    |

2. 你是否赞同以下行为?

| 情境                         | 非常不赞同 | 不赞同 | 一般 | 赞同 | 非常赞同 |
|----------------------------|-------|-----|----|----|------|
| (1) 吃饭快慢对健康影响不大。           | ①     | ②   | ③  | ④  | ⑤    |
| (2) 早饭时间，还不饿就不吃了。          | ①     | ②   | ③  | ④  | ⑤    |
| (3) 不渴的时候不用喝水。             | ①     | ②   | ③  | ④  | ⑤    |
| (4) 一边吃饭一边看视频可以一举两得。       | ①     | ②   | ③  | ④  | ⑤    |
| (5) 果酒不算酒，可以喝。             | ①     | ②   | ③  | ④  | ⑤    |
| (6) 我正在长身体，要多吃肉。           | ①     | ②   | ③  | ④  | ⑤    |
| (7) 仔细检查保质期过一天的面包，无异常就可以吃。 | ①     | ②   | ③  | ④  | ⑤    |
| (8) 剩饭要彻底加热后才能吃。           | ①     | ②   | ③  | ④  | ⑤    |
| (9) 没吃完的菜应及时放冰箱，不应等放凉。     | ①     | ②   | ③  | ④  | ⑤    |
| (10) 厨房切生肉的案板洗净后就能切熟肉。     | ①     | ②   | ③  | ④  | ⑤    |

3. 请根据你过去一周的实际情况，在下表对应的序号处打勾。

| 你过去一周内有几天吃了以下食物?                                 | 没有吃 | 1~2天 | 3~4天 | 5~6天 | 每天都吃 |
|--------------------------------------------------|-----|------|------|------|------|
| (1) <b>粗粮</b> (土豆、红薯、杂豆、玉米、燕麦、小米等)               | ①   | ②    | ③    | ④    | ⑤    |
| (2) <b>水果</b>                                    | ①   | ②    | ③    | ④    | ⑤    |
| (3) <b>蔬菜、菌藻类</b> (蘑菇、海带等)                       | ①   | ②    | ③    | ④    | ⑤    |
| (4) <b>奶制品</b> (牛奶、酸奶、奶粉或奶酪，不包括酸酸乳等)             | ①   | ②    | ③    | ④    | ⑤    |
| (5) <b>豆制品</b> (豆腐、豆浆、豆干、豆腐丝、腐竹、豆花等)             | ①   | ②    | ③    | ④    | ⑤    |
| (6) <b>含糖饮料</b> (含糖碳酸饮料、含糖茶饮料、市售果蔬汁饮料、乳饮料、运动饮料等) | ①   | ②    | ③    | ④    | ⑤    |
| (7) <b>早餐</b>                                    | ①   | ②    | ③    | ④    | ⑤    |
| (8) <b>油炸食品</b> (油炸方便面、油条、炸串、薯片等)                | ①   | ②    | ③    | ④    | ⑤    |
| (9) <b>西式快餐</b> (汉堡、薯条、炸鸡等)                      | ①   | ②    | ③    | ④    | ⑤    |

4. 下列农作物和食物对应**错误**的是？

- ①土豆和薯条    ②小麦和馒头    ③红薯和粉条    ④高粱和爆米花    ⑤水稻和大米

5. **连一连**：参考示例，将左边的食物和右边的食物分类正确连线

|      |        |
|------|--------|
| 土豆   | 蔬菜水果类  |
| 鲤鱼   | 谷薯杂豆类  |
| 冰糖   | 大豆类和坚果 |
| 西兰花  | 纯能量食物  |
| 黄豆豆浆 | 动物性食物  |

6. (**三~六年级跳过此题**) 以下食物及其富含的营养素对应**错误**的是：

- ①动物肝脏—维生素 A    ②米饭—碳水化合物    ③桔子—维生素 C    ④鸡肉—钙

7. 数一数你**昨天**吃了多少种食物？（例如芹菜牛肉包子里面可能含面粉、牛肉、芹菜 3 种食物，调味料除外）

- ① 0~3 种    ② 4~7 种    ③ 8~11 种    ④ 12 种及以上

8. 你认为以下哪种是比较健康的零食？

- ①薯片    ②蜜枣    ③酸奶    ④奶茶    ⑤蛋糕

9. **上周**你有几天的**累计锻炼时间超过 60 分钟**？（把一天内的运动时间加起来，包括体育课运动、课间操、跑步、快走、游泳等使心跳明显加快、有点吃力的活动）

**上学日（周一至周五）**：① 0 天    ② 1 天    ③ 2 天    ④ 3 天    ⑤ 4 天    ⑥ 5 天

**周末（周六日）**：① 0 天    ② 1 天    ③ 2 天

10. **上周**你平均每天有多长时间是在**看电子屏幕**？（课外时间使用电视、手机、电脑、pad、游戏机等）

**上学日（周一至周五）**：① <1 小时    ② 1~2 小时    ③ 3~4 小时    ④ 5~6 小时    ⑤ ≥7 小时

**周末（周六日）**：① <1 小时    ② 1~2 小时    ③ 3~4 小时    ④ 5~6 小时    ⑤ ≥7 小时

11. (1) 你最近一次测身高为\_\_\_\_\_厘米，**体重**为\_\_\_\_\_公斤（或\_\_\_\_\_斤）；\_\_\_\_年\_\_\_\_月测量

(2) 你觉得自己的**体型**怎样？    ①偏瘦    ②适中    ③偏胖

12. (**三四年级跳过此题**) BMI（体质指数）是用来评价体型的常用方法，公式：**BMI = 体重(kg) / 身高<sup>2</sup>(m<sup>2</sup>)**

小兰 8 岁整，体重为 28.8kg，身高为 1.20m，已知 8 岁女孩 BMI 超过 19.4 kg/m<sup>2</sup> 属于肥胖，你来判断一下她是否肥胖呢？

- ①是    ②不是    ③不清楚

13. (1) 假如今天是 2019 年 6 月 1 日，你想喝牛奶，在家里找到了这三种，你会选择哪一个？

**纯牛奶**

生产日期：2019年5月20日  
保质期：室温14天

①

**鲜牛奶**

生产日期：2019年5月26日  
保质期：室温3天

②

**高钙奶**

生产日期：2019年4月29日  
保质期：室温30天

③

(2) 有以下两个品种的牛奶，观察它们的营养成分表，你觉得哪个品种更适合超重肥胖的人？

① 品种 1

② 品种 2

③ 不清楚

品种 1 营养成分表

| 项目    | 每100毫升     | 营养素参考值%<br>/NRV% |
|-------|------------|------------------|
| 能量    | 265千焦 (kJ) | 3%               |
| 蛋白质   | 3.5克 (g)   | 6%               |
| 脂肪    | 3.4克 (g)   | 6%               |
| 碳水化合物 | 4.7克 (g)   | 2%               |
| 钠     | 40毫克 (mg)  | 2%               |
| 钙     | 122毫克 (mg) | 15%              |

品种 2 营养成分表

| 项目    | 每100毫升     | 营养素参考值%<br>/NRV% |
|-------|------------|------------------|
| 能量    | 182千焦 (kJ) | 2%               |
| 蛋白质   | 3.0克 (g)   | 5%               |
| 脂肪    | 1.3克 (g)   | 2%               |
| 碳水化合物 | 4.9克 (g)   | 2%               |
| 钠     | 72毫克 (mg)  | 4%               |
| 钙     | 125毫克 (mg) | 16%              |

(3) (三四年级跳过此题) 上题的食品营养标签中，“**营养素参考值%/NRV%**”是指 100 克/毫升该食品所含营养成分占每日参考摄入量的**百分比**。那么，如果只喝靠**品种 2** 的牛奶来摄入钙，那喝多少就可以满足我们一天需要的**钙**？（估算即可）

① 200 毫升左右

② 400 毫升左右

③ 600 毫升左右

④ 不清楚怎么算

14. 中国居民**平衡膳食宝塔**最底下的一层是什么？

① 蔬菜水果

② 动物性食物

③ 谷薯类

④ 奶豆类

⑤ 不清楚

15. (三四年级跳过此题) 中国居民膳食指南建议每天吃 **200~350 克** 的水果，以下哪个选项**不能**达到推荐量？（图中 330 毫升易拉罐为参照物）

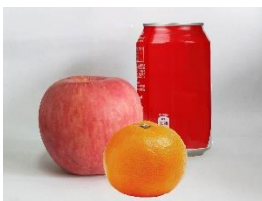

① 一个苹果和一只桔子

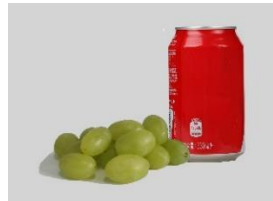

② 15 颗葡萄

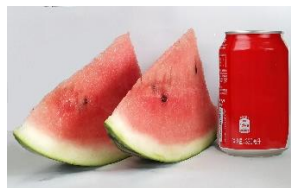

③ 两块西瓜

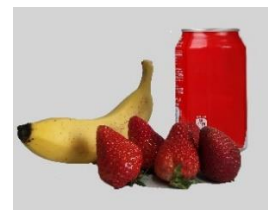

④ 一根香蕉和五颗草莓

16. 如果同学想约你去吃**路边摊烧烤**，周边环境并不卫生，你会怎么做？

① 既然同学邀请，就吃一次没问题，还是去吧

② 烧烤那么好吃，当然要吃了

③ 劝说朋友去吃别的，路边烧烤不健康不卫生

④ 借口有事不去

17. 假如你的家人患有较严重的糖尿病，听别人劝说正准备停药吃保健品，你会怎么做？

① 仔细阅读保健品说明书或咨询商家，看是否适合家人

② 吃药有副作用，而保健品没有，家人应该听劝

③ 建议家人咨询医生、营养师或其他专业人士再决定

④ 我不懂，不给建议
